# Supplementary material for: Identification of cuproptosis-related subtypes in lung adenocarcinoma and its potential significance
Source: Front Pharmacol. 2022 Oct 3;13:934722. doi: 10.3389/fphar.2022.934722 (PMC9573969; doi:10.3389/fphar.2022.934722)
Supplement: Supplementary file 2 [file DataSheet2.xls]

## Sheet: Table S1
Gene	Type
FDX1	Cuproptosis
LIPT1	Cuproptosis
LIAS	Cuproptosis
DLD	Cuproptosis
DBT	Cuproptosis
DLST	Cuproptosis
DLAT	Cuproptosis
PDHA1	Cuproptosis
PDHB	Cuproptosis
SLC31A1	Cuproptosis
ATP7A	Cuproptosis
ATP7B	Cuproptosis
MTF1	Cuproptosis
GLS	Cuproptosis
CDKN2A	Cuproptosis
GCSH	Cuproptosis

## Sheet: Table S2
The primer sequences of CRGs used for qRT-PCR
FDX1	sense	TTTGGTGCATGTGAGGGAA
	antisense	GGCATCAGCCACTGTTTCA
LIPT1	sense	GATGGGACGTTCTTGTCTT
	antisense	ATCCGTTGGGTTTATTAGG
LIAS	sense	AGGCGAGAATGATGAGCAA
	antisense	ATGAAGAACGCACCAAAGG
DLD	sense	AGTGCCTCTGAGAACTTAC
	antisense	ACTGTCTTGAAGCCTAACT
DBT	sense	CAATGGATACTGAGCAGGGTT
	antisense	TCACTGGTTTGGCAAAGGT
GCSH	sense	GAACAGTGGGAATCAGCAA
	antisense	CAGCCAACCATCTTCATAACA
DLST	sense	GCAGGTTCCATCACCAGCAA
	antisense	CAGTCCCAATCCCAAGAGG
DLAT	sense	CCAACCGAAGTAACAGATT
	antisense	AAGAGGGCTAACAAACACC
PDHA1	sense	GACCATCTCATCACAGCCTAC
	antisense	TTTCCCTTTAGCACAACCT
PDHB	sense	CCTTCAGCCTGTGCCTATA
	antisense	CACCACCACTGGATTGTTA
SLC31A1	sense	TGACCTTCTACTTTGGCTTTA
	antisense	GCTGACTTGTGACTTACGC
ATP7A	sense	GTGGATGGTCGTGTTATTG
	antisense	TAGGAGCCTTTGATGTTTG
ATP7B	sense	CACCCTCCAACTGAGAATAG
	antisense	CACTGGGCTGGTACAAGAA
MTF1	sense	CCAGGACTTTCTGTTGTTG
	antisense	GATGGTTATGGTGGGATTA
GLS	sense	CCAAAGTTCCCTTCTGTCT
	antisense	ATCTTAGTCCACTCGGCTC
CDKN2A	sense	TTCCTGGACACGCTGGTGGT
	antisense	GCATCTATGCGGGCATGGTTA

## Sheet: Table S3
The gene lists of MSigDB-derived hallmark gene set (h.all.v7.4.symbols)
HALLMARK_TNFA_SIGNALING_VIA_NFKB	http://www.gsea-msigdb.org/gsea/msigdb/cards/HALLMARK_TNFA_SIGNALING_VIA_NFKB	JUNB	CXCL2	ATF3	NFKBIA	TNFAIP3	PTGS2	CXCL1	IER3	CD83	CCL20	CXCL3	MAFF	NFKB2	TNFAIP2	HBEGF	KLF6	BIRC3	PLAUR	ZFP36	ICAM1	JUN	EGR3	IL1B	BCL2A1	PPP1R15A	ZC3H12A	SOD2	NR4A2	IL1A	RELB	TRAF1	BTG2	DUSP1	MAP3K8	ETS2	F3	SDC4	EGR1	IL6	TNF	KDM6B	NFKB1	LIF	PTX3	FOSL1	NR4A1	JAG1	CCL4
HALLMARK_HYPOXIA	http://www.gsea-msigdb.org/gsea/msigdb/cards/HALLMARK_HYPOXIA	PGK1	PDK1	GBE1	PFKL	ALDOA	ENO2	PGM1	NDRG1	HK2	ALDOC	GPI	MXI1	SLC2A1	P4HA1	ADM	P4HA2	ENO1	PFKP	AK4	FAM162A	PFKFB3	VEGFA	BNIP3L	TPI1	ERO1A	KDM3A	CCNG2	LDHA	GYS1	GAPDH	BHLHE40	ANGPTL4	JUN	SERPINE1	LOX	GCK	PPFIA4	MAFF	DDIT4	SLC2A3	IGFBP3	NFIL3	FOS	RBPJ	HK1	CITED2	ISG20	GALK1
HALLMARK_CHOLESTEROL_HOMEOSTASIS	http://www.gsea-msigdb.org/gsea/msigdb/cards/HALLMARK_CHOLESTEROL_HOMEOSTASIS	FDPS	CYP51A1	IDI1	FDFT1	DHCR7	SQLE	HMGCS1	NSDHL	LSS	MVD	LDLR	TM7SF2	ALDOC	EBP	SCD	PMVK	MVK	LPL	SC5D	FADS2	HMGCR	HSD17B7	ANXA13	SREBF2	PCYT2	ACSS2	ATF3	ADH4	ETHE1	ECH1	CBS	GUSB	FASN	LGALS3	ATF5	ANXA5	TP53INP1	CHKA	GSTM2	ACAT2	AVPR1A	PLSCR1	CLU	ERRFI1	TRIB3	CXCL16	TNFRSF12A	ACTG1
HALLMARK_MITOTIC_SPINDLE	http://www.gsea-msigdb.org/gsea/msigdb/cards/HALLMARK_MITOTIC_SPINDLE	ARHGEF2	CLASP1	KIF11	KIF23	ALS2	ARF6	MYO9B	MYH9	TUBGCP3	CKAP5	RACGAP1	PREX1	ARHGEF3	NUMA1	SPTBN1	KIF2C	KIF5B	TTK	APC	CEP250	PAFAH1B1	CDC42EP2	KIF3B	CCDC88A	KIF15	BIRC5	CNTROB	NF1	TSC1	CDC27	CNTRL	TUBGCP5	KIF4A	MAPRE1	FGD6	BRCA2	PLK1	RASA1	NEK2	WASF1	TOP2A	TRIO	ARHGEF11	KATNB1	PRC1	ANLN	CDK5RAP2	SMC3
HALLMARK_WNT_BETA_CATENIN_SIGNALING	http://www.gsea-msigdb.org/gsea/msigdb/cards/HALLMARK_WNT_BETA_CATENIN_SIGNALING	MYC	CTNNB1	JAG2	NOTCH1	DLL1	AXIN2	PSEN2	FZD1	NOTCH4	LEF1	AXIN1	NKD1	WNT5B	CUL1	JAG1	MAML1	KAT2A	GNAI1	WNT6	PTCH1	NCOR2	DKK4	HDAC2	DKK1	TCF7	WNT1	NUMB	ADAM17	DVL2	PPARD	NCSTN	HDAC5	CCND2	FRAT1	CSNK1E	RBPJ	FZD8	TP53	SKP2	HEY2	HEY1	HDAC11
HALLMARK_TGF_BETA_SIGNALING	http://www.gsea-msigdb.org/gsea/msigdb/cards/HALLMARK_TGF_BETA_SIGNALING	TGFBR1	SMAD7	TGFB1	SMURF2	SMURF1	BMPR2	SKIL	SKI	ACVR1	PMEPA1	NCOR2	SERPINE1	JUNB	SMAD1	SMAD6	PPP1R15A	TGIF1	FURIN	SMAD3	FKBP1A	MAP3K7	BMPR1A	CTNNB1	HIPK2	KLF10	BMP2	ENG	APC	PPM1A	XIAP	CDH1	ID1	LEFTY2	CDKN1C	TRIM33	RAB31	TJP1	SLC20A1	CDK9	ID3	NOG	ARID4B	IFNGR2	ID2	PPP1CA	SPTBN1	WWTR1	BCAR3
HALLMARK_IL6_JAK_STAT3_SIGNALING	http://www.gsea-msigdb.org/gsea/msigdb/cards/HALLMARK_IL6_JAK_STAT3_SIGNALING	IL4R	IL6ST	STAT1	IL1R1	CSF2RB	SOCS3	STAT3	OSMR	IL2RG	IFNGR1	TYK2	IL13RA1	TLR2	IFNGR2	IL10RB	IL6	IL1R2	IL3RA	IFNAR1	TNFRSF1A	MYD88	ACVR1B	CSF3R	ITGB3	REG1A	CXCL1	A2M	CSF2RA	IL15RA	IRF9	PDGFC	HAX1	BAK1	EBI3	INHBE	CRLF2	TNFRSF1B	CD14	PTPN1	PTPN2	IL1B	CSF1	IL18R1	TNF	PF4	CXCL13	LTBR	FAS
HALLMARK_DNA_REPAIR	http://www.gsea-msigdb.org/gsea/msigdb/cards/HALLMARK_DNA_REPAIR	POLR2H	POLR2A	POLR2G	POLR2E	POLR2J	POLR2F	POLR2C	POLR2K	GTF2H3	POLR2D	ERCC3	DDB2	POLR1C	XPC	PCNA	POLR2I	SUPT4H1	POLD3	POLR3GL	POLR3C	GTF2B	POLR1D	NCBP2	NELFE	GTF2F1	ERCC5	LIG1	ERCC1	ERCC4	POLD4	NELFB	RFC2	ELL	TAF10	RRM2B	SUPT5H	RPA3	SNAPC5	SSRP1	RFC3	RPA2	ELOA	TAF12	NELFCD	TAF13	TAF6	TAF9	GTF2A2
HALLMARK_G2M_CHECKPOINT	http://www.gsea-msigdb.org/gsea/msigdb/cards/HALLMARK_G2M_CHECKPOINT	AURKA	CCNA2	TOP2A	CCNB2	CENPA	BIRC5	CDC20	PLK1	TTK	PRC1	NDC80	KIF11	NUSAP1	CKS2	KIF2C	MKI67	AURKB	TPX2	SMC4	BUB1	CENPF	RACGAP1	CENPE	KIF23	UBE2C	MCM6	MCM3	PTTG1	CDK1	KIF4A	ESPL1	MAD2L1	NEK2	KIF22	HMMR	KPNA2	CDKN3	CDC25A	H2AX	CDC25B	PLK4	CDC6	CCNF	MCM5	LMNB1	E2F3	KIF15	CHEK1
HALLMARK_APOPTOSIS	http://www.gsea-msigdb.org/gsea/msigdb/cards/HALLMARK_APOPTOSIS	CASP3	CASP9	DFFA	CASP7	CFLAR	BIRC3	PMAIP1	CASP8	JUN	BCL2L11	MCL1	IL1B	SPTAN1	DIABLO	BAX	BIK	IL1A	BID	CDKN1A	GADD45A	DDIT3	CDKN1B	TNF	GSN	TNFSF10	CASP6	SQSTM1	FASLG	EGR3	CD44	FAS	IL18	IGFBP6	PRF1	DAP	CCND1	BTG3	F2R	SATB1	BNIP3L	CASP4	TNFRSF12A	CREBBP	RHOB	GPX3	PDGFRB	TSPO	CCND2
HALLMARK_NOTCH_SIGNALING	http://www.gsea-msigdb.org/gsea/msigdb/cards/HALLMARK_NOTCH_SIGNALING	JAG1	NOTCH3	NOTCH2	APH1A	HES1	CCND1	FZD1	PSEN2	FZD7	DTX1	DLL1	FZD5	MAML2	NOTCH1	PSENEN	WNT5A	CUL1	WNT2	DTX4	SAP30	PPARD	KAT2A	HEYL	SKP1	RBX1	TCF7L2	ARRB1	LFNG	PRKCA	DTX2	ST3GAL6	FBXW11
HALLMARK_ADIPOGENESIS	http://www.gsea-msigdb.org/gsea/msigdb/cards/HALLMARK_ADIPOGENESIS	FABP4	ADIPOQ	PPARG	LIPE	DGAT1	LPL	CPT2	CD36	GPAM	ADIPOR2	ACAA2	ETFB	ACOX1	ACADM	HADH	IDH1	SORBS1	ACADS	UCK1	SCP2	DECR1	CDKN2C	TALDO1	TST	MCCC1	PGM1	REEP5	BCL2L13	SLC25A10	ME1	PHYH	PIM3	YWHAG	NDUFAB1	GPD2	ADIG	ECHS1	QDPR	CS	ECH1	SLC25A1	ACADL	TOB1	GRPEL1	CRAT	GBE1	CAVIN2	SCARB1
HALLMARK_ESTROGEN_RESPONSE_EARLY	http://www.gsea-msigdb.org/gsea/msigdb/cards/HALLMARK_ESTROGEN_RESPONSE_EARLY	GREB1	CA12	SLC9A3R1	MYB	ANXA9	IGFBP4	SYBU	NPY1R	PDZK1	NRIP1	MLPH	HSPB8	EGR3	KRT19	LRIG1	KDM4B	PGR	RHOBTB3	TPD52L1	ELOVL2	RET	TPBG	TFF1	MAPT	SCNN1A	ABAT	FLNB	XBP1	CELSR2	RAB31	MYBL1	MREG	FAM102A	MSMB	STC2	RETREG1	SIAH2	ZNF185	SLC19A2	SLC1A4	FHL2	BCL2	PMAIP1	AREG	OVOL2	TSKU	ADCY9	RASGRP1
HALLMARK_ESTROGEN_RESPONSE_LATE	http://www.gsea-msigdb.org/gsea/msigdb/cards/HALLMARK_ESTROGEN_RESPONSE_LATE	TFF1	SLC9A3R1	TPD52L1	PRSS23	CA12	PDZK1	ANXA9	CELSR2	TJP3	PGR	RET	MYB	TPBG	EGR3	ARL3	OLFM1	NPY1R	SCNN1A	XBP1	AREG	IL17RB	NRIP1	ASS1	TFF3	FKBP4	SLC27A2	SEMA3B	GPER1	LLGL2	AGR2	KRT19	CCN5	BLVRB	FLNB	PDCD4	CALCR	IGFBP4	DNAJC12	TIAM1	TSPAN13	CXCL12	RAB31	PKP3	CYP26B1	FKBP5	SIAH2	ISG20	TMPRSS3
HALLMARK_ANDROGEN_RESPONSE	http://www.gsea-msigdb.org/gsea/msigdb/cards/HALLMARK_ANDROGEN_RESPONSE	KLK3	KLK2	ACSL3	PIAS1	CAMKK2	NKX3-1	TMPRSS2	APPBP2	CENPN	BMPR1B	MAF	FADS1	ZBTB10	HMGCR	SPCS3	INSIG1	NGLY1	UBE2J1	ELK4	ABCC4	ELOVL5	ALDH1A3	AZGP1	ABHD2	SAT1	DBI	DHCR24	SORD	STK39	TPD52	IDI1	B2M	MAP7	DNAJB9	FKBP5	HERC3	PGM3	HOMER2	ELL2	UAP1	SEC24D	LMAN1	PMEPA1	INPP4B	RRP12	SELENOP	NDRG1	KRT19
HALLMARK_MYOGENESIS	http://www.gsea-msigdb.org/gsea/msigdb/cards/HALLMARK_MYOGENESIS	ACTA1	TNNI2	MYL1	TNNC1	TNNC2	MYH3	MYLPF	TNNT3	TNNT2	CASQ2	ACTC1	MYOM1	MYL4	MYBPH	MYH7	MYH8	ACTN2	TNNI1	CRYAB	SGCG	HRC	TNNT1	DES	MYOZ1	RYR1	CSRP3	ADAM12	ATP2A1	CKM	SVIL	MYOM2	MYL6B	TPM2	MYL2	CKMT2	BIN1	MYH1	ENO3	FLII	FXYD1	TPM3	DMD	IGFBP3	CHRNB1	SPEG	FHL1	ACTN3	TCAP
HALLMARK_PROTEIN_SECRETION	http://www.gsea-msigdb.org/gsea/msigdb/cards/HALLMARK_PROTEIN_SECRETION	ARCN1	TMED10	COPB2	RAB14	ATP7A	COPB1	LAMP2	EGFR	IGF2R	COPE	PPT1	AP3S1	BET1	CLCN3	AP2S1	CLTC	AP2M1	RER1	KIF1B	ARF1	OCRL	ICA1	MON2	ARFGEF2	TMED2	NAPG	TMX1	PAM	SCAMP1	SH3GL2	RAB2A	COG2	VAMP3	ERGIC3	DOP1A	VAMP4	VPS4B	NAPA	GNAS	STX7	SEC22B	VPS45	STX16	YKT6	SNX2	ARFGEF1	CLTA	CLN5
HALLMARK_INTERFERON_ALPHA_RESPONSE	http://www.gsea-msigdb.org/gsea/msigdb/cards/HALLMARK_INTERFERON_ALPHA_RESPONSE	MX1	ISG15	OAS1	IFIT3	IFI44	IFI35	IRF7	RSAD2	IFI44L	IFITM1	IFI27	IRF9	OASL	EIF2AK2	IFIT2	CXCL10	TAP1	SP110	DDX60	UBE2L6	USP18	PSMB8	IFIH1	BST2	LGALS3BP	ADAR	ISG20	GBP2	IRF1	PLSCR1	PSMB9	HERC6	SAMD9	CMPK2	IFITM3	RTP4	STAT2	SAMD9L	LY6E	IFITM2	HELZ2	CXCL11	TRIM21	PARP14	TRIM26	PARP12	NMI	RNF31
HALLMARK_INTERFERON_GAMMA_RESPONSE	http://www.gsea-msigdb.org/gsea/msigdb/cards/HALLMARK_INTERFERON_GAMMA_RESPONSE	STAT1	ISG15	IFIT1	MX1	IFIT3	IFI35	IRF7	IFIT2	OAS2	TAP1	EIF2AK2	RSAD2	MX2	IRF1	OAS3	TNFSF10	IRF9	CXCL10	IFI44	BST2	XAF1	SP110	OASL	PSMB8	IFI44L	IFITM3	DDX60	LGALS3BP	GBP4	IRF8	PSMB9	PML	IFIH1	UBE2L6	IFI27	ADAR	LY6E	STAT2	CXCL9	IL10RA	PLA2G4A	TRIM21	USP18	PTGS2	EPSTI1	C1S	DDX58	IL15
HALLMARK_APICAL_JUNCTION	http://www.gsea-msigdb.org/gsea/msigdb/cards/HALLMARK_APICAL_JUNCTION	ACTN1	CLDN7	ACTN3	CLDN19	DLG1	TJP1	COL17A1	NECTIN1	CLDN9	CDH3	CTNND1	CDH1	LIMA1	VCL	SHROOM2	NECTIN3	NECTIN2	CLDN14	PTPRC	THY1	VASP	ITGB1	ZYX	ACTN4	CLDN4	CADM3	ITGA3	NF2	B4GALT1	NEXN	CDH6	ADAM15	PTK2	HADH	LAMB3	CLDN11	CDH4	IRS1	SORBS3	CLDN8	EVL	CLDN15	THBS3	NECTIN4	JAM3	CDH11	ITGB4	RASA1
HALLMARK_APICAL_SURFACE	http://www.gsea-msigdb.org/gsea/msigdb/cards/HALLMARK_APICAL_SURFACE	B4GALT1	RHCG	MAL	LYPD3	PKHD1	ATP6V0A4	CRYBG1	SHROOM2	SRPX	MDGA1	TMEM8B	THY1	PCSK9	EPHB4	DCBLD2	GHRL	LYN	GAS1	FLOT2	PLAUR	AKAP7	ATP8B1	EFNA5	SLC34A3	APP	GSTM3	HSPB1	SLC2A4	IL2RB	RTN4RL1	NCOA6	SULF2	ADAM10	BRCA1	GATA3	AFAP1L2	IL2RG	CD160	ADIPOR2	SLC22A12	NTNG1	SCUBE1	CX3CL1	CROCC
HALLMARK_HEDGEHOG_SIGNALING	http://www.gsea-msigdb.org/gsea/msigdb/cards/HALLMARK_HEDGEHOG_SIGNALING	SHH	PTCH1	NRCAM	NRP1	SCG2	AMOT	UNC5C	ADGRG1	HEY1	GLI1	THY1	SLIT1	CDK6	HEY2	NRP2	TLE3	TLE1	L1CAM	PLG	NKX6-1	NF1	RASA1	ETS2	RTN1	CRMP1	MYH9	VEGFA	CELSR1	CNTFR	ACHE	PML	CDK5R1	VLDLR	OPHN1	LDB1	DPYSL2
HALLMARK_COMPLEMENT	http://www.gsea-msigdb.org/gsea/msigdb/cards/HALLMARK_COMPLEMENT	C2	C1S	CFB	C1R	SERPINE1	MMP14	SERPING1	CTSL	F5	MMP13	F7	CTSS	LGMN	PLG	C1QA	CASP1	GZMA	ADAM9	CALM3	C1QC	TIMP1	DPP4	KLK1	KLKB1	CD59	CR2	MMP15	LAP3	SPOCK2	F10	CTSB	SERPINA1	CTSO	CD40LG	CBLB	PDP1	C4BPB	PLEK	GP9	PLAUR	C3	F2	CASP4	STX4	CTSC	USP15	CR1	DUSP6
HALLMARK_UNFOLDED_PROTEIN_RESPONSE	http://www.gsea-msigdb.org/gsea/msigdb/cards/HALLMARK_UNFOLDED_PROTEIN_RESPONSE	ATF4	HERPUD1	PARN	EXOSC4	HSP90B1	XBP1	EXOSC9	HSPA5	ATF3	EXOSC1	EXOSC5	ASNS	ARFGAP1	WFS1	SRPRB	DNAJB9	TSPYL2	NFYA	CALR	KHSRP	DNAJC3	EXOSC2	NOP14	ATF6	HYOU1	RRP9	NOP56	CXXC1	IGFBP1	CNOT4	DCP2	PDIA6	ATP6V0D1	PREB	SEC31A	GOSR2	SERP1	NFYB	NHP2	DCTN1	SLC7A5	SSR1	EDEM1	EDC4	EIF2AK3	MTHFD2	SRPRA	NOLC1
HALLMARK_PI3K_AKT_MTOR_SIGNALING	http://www.gsea-msigdb.org/gsea/msigdb/cards/HALLMARK_PI3K_AKT_MTOR_SIGNALING	MAPK8	PIK3R3	GRB2	NFKBIB	MAP2K6	MAPK9	AKT1	MAPK1	PLCG1	TRIB3	GSK3B	MAP2K3	CDKN1A	RAC1	RIPK1	AKT1S1	ACTR2	PRKAR2A	YWHAB	HRAS	PDK1	PIKFYVE	TBK1	ACTR3	E2F1	MYD88	ITPR2	SQSTM1	RPS6KA1	PTPN11	MAPKAP1	PLCB1	RAF1	CAMK4	RPTOR	CFL1	CDK4	TRAF2	GNGT1	UBE2N	ADCY2	CDKN1B	VAV3	FGF6	ECSIT	RALB	ARF1	MKNK1
HALLMARK_MTORC1_SIGNALING	http://www.gsea-msigdb.org/gsea/msigdb/cards/HALLMARK_MTORC1_SIGNALING	FADS1	DDIT4	CALR	HK2	PGK1	SLC7A5	CTSC	ACSL3	SLC1A5	M6PR	TFRC	DDIT3	TMEM97	IFRD1	PLOD2	TUBA4A	PSAT1	CORO1A	LDHA	MTHFD2	FADS2	VLDLR	WARS1	SCD	P4HA1	ACTR2	IDH1	SLC2A1	GBE1	SERPINH1	NUPR1	PSMG1	PSPH	NAMPT	CDKN1A	BHLHE40	HSPA9	HSPA5	EGLN3	LGMN	PNP	XBP1	SLA	DDX39A	HSPE1	ACLY	SLC7A11	SSR1
HALLMARK_E2F_TARGETS	http://www.gsea-msigdb.org/gsea/msigdb/cards/HALLMARK_E2F_TARGETS	AURKA	BRCA2	CCP110	CENPE	CKS2	DCLRE1B	DNMT1	DONSON	EED	GINS1	GINS4	H2AZ1	LIG1	MAD2L1	MCM2	MCM4	MCM5	MCM7	MELK	MMS22L	NAA38	NASP	NUDT21	NUP205	ORC6	PCNA	PLK4	POLE	PRIM2	RAD51AP1	RFC2	RPA2	RPA3	SUV39H1	TMPO	UBE2T	WDR90	CDK1	MCM3	TOP2A	MCM6	BIRC5	CCNB2	RRM2	HMGB2	BUB1B	RFC3	EZH2
HALLMARK_MYC_TARGETS_V1	http://www.gsea-msigdb.org/gsea/msigdb/cards/HALLMARK_MYC_TARGETS_V1	PCNA	PSMD8	PSMD7	SET	SNRPA1	RAN	SRSF2	G3BP1	STARD7	NPM1	BUB3	EIF3D	XPO1	FBL	EIF4A1	CANX	NAP1L1	CBX3	CCT3	C1QBP	U2AF1	UBE2L3	SSBP1	SRSF1	TCP1	MCM2	EIF3B	PSMD14	SNRPA	PWP1	APEX1	TXNL4A	HNRNPR	PSMB2	HPRT1	MCM6	NME1	SNRPD1	EEF1B2	HSPD1	CAD	RPL18	PGK1	DDX18	RPS2	LDHA	RUVBL2	RNPS1
HALLMARK_MYC_TARGETS_V2	http://www.gsea-msigdb.org/gsea/msigdb/cards/HALLMARK_MYC_TARGETS_V2	SLC19A1	MRTO4	TMEM97	RRP9	PES1	TFB2M	EXOSC5	IPO4	NDUFAF4	NOC4L	MYC	SRM	PA2G4	GNL3	NOLC1	WDR43	RABEPK	NOP16	TBRG4	DDX18	NIP7	WDR74	BYSL	HSPD1	PLK4	NOP2	PPAN	NOP56	RCL1	NPM1	AIMP2	RRP12	PPRC1	TCOF1	MCM5	HK2	CBX3	PLK1	PHB	MCM4	CDK4	DUSP2	MYBBP1A	UTP20	PRMT3	FARSA	MAP3K6	LAS1L
HALLMARK_EPITHELIAL_MESENCHYMAL_TRANSITION	http://www.gsea-msigdb.org/gsea/msigdb/cards/HALLMARK_EPITHELIAL_MESENCHYMAL_TRANSITION	COL3A1	COL5A2	COL5A1	FBN1	COL1A1	FN1	COL6A3	SERPINE1	COL1A2	COL4A1	COL4A2	VCAN	IGFBP3	TGFBI	SPARC	LUM	LAMC1	LOX	LAMC2	CCN2	TAGLN	COL7A1	LOXL2	COL6A2	ITGAV	THBS2	COL16A1	NNMT	TPM1	CDH2	MMP2	COL11A1	THBS1	FAP	BGN	SERPINH1	FSTL1	POSTN	THY1	SPP1	TNC	TFPI2	NID2	ITGB5	MMP3	VIM	LOXL1	FBLN5
HALLMARK_INFLAMMATORY_RESPONSE	http://www.gsea-msigdb.org/gsea/msigdb/cards/HALLMARK_INFLAMMATORY_RESPONSE	CXCL10	CCL2	CCL5	FPR1	CCL20	IL1A	CXCL8	CCL7	CCL22	CXCL11	CCR7	EDN1	CD40	CXCL9	IL6	IL1B	TLR2	IL1R1	CD69	ICAM1	CCRL2	AQP9	EREG	C3AR1	GNA15	CMKLR1	PTGER4	LIF	IL15	NAMPT	OPRK1	ITGB8	PTAFR	ADM	PLAUR	NFKB1	INHBA	OSM	TNFSF10	TNFSF15	IFNGR2	ADGRE1	IL12B	CSF1	CXCL6	TNFRSF9	LYN	ACVR2A
HALLMARK_XENOBIOTIC_METABOLISM	http://www.gsea-msigdb.org/gsea/msigdb/cards/HALLMARK_XENOBIOTIC_METABOLISM	CYP1A1	FAH	DCXR	CYP1A2	GSTA3	CYP2J2	CYP27A1	ADH1C	UGDH	ASL	NQO1	ALAS1	GSTM4	CYP2C18	PTS	CYB5A	ACOX2	EPHX1	LCAT	SLC35D1	GSS	FMO3	IDH1	AKR1C3	SLC22A1	GSTO1	ARG1	CDO1	FMO1	ALDH9A1	POR	NDRG2	UPB1	ECH1	PTGES	PDK4	AHCY	COMT	AOX1	CFB	DDAH2	HGFAC	F11	CYP26A1	MCCC2	SERPINA6	GNMT	BLVRB
HALLMARK_FATTY_ACID_METABOLISM	http://www.gsea-msigdb.org/gsea/msigdb/cards/HALLMARK_FATTY_ACID_METABOLISM	ACAA1	ACAA2	ACADL	ACADM	ACOT8	ACOX1	ACSL1	ALDH3A2	CCDC58	CPT2	CYP4A11	DECR1	ECH1	ECI1	ELOVL5	FABP1	FABP2	HADH	HIBCH	HMGCL	HSD17B11	IDH1	ME1	MGLL	MLYCD	PCBD1	RETSAT	S100A10	SUCLG1	VNN1	EHHADH	ALDH9A1	HADHB	ECHS1	ACADS	CA2	HSD17B10	ALDH1A1	ACADVL	HSD17B4	CA4	ADH1C	ADH7	PTS	MAOA	HAO2	HSD17B7	MCEE
HALLMARK_OXIDATIVE_PHOSPHORYLATION	http://www.gsea-msigdb.org/gsea/msigdb/cards/HALLMARK_OXIDATIVE_PHOSPHORYLATION	NDUFS3	UQCRB	NDUFS2	SDHA	UQCRC1	NDUFA9	NDUFS4	NDUFS1	NDUFA2	NDUFS8	SDHB	NNT	ATP5PO	ATP5MC3	NDUFS7	ATP5F1A	NDUFV1	COX5B	UQCRH	NDUFA1	ATP5F1C	ATP5F1B	COX7B	SDHD	CYCS	NDUFA6	NDUFAB1	COX8A	ACO2	ATP5MC1	CYC1	NDUFB6	ATP5F1E	COX5A	UQCRC2	COX6A1	ATP5F1D	COX6C	ATP5PF	NDUFB3	IDH3B	OGDH	NDUFB8	SURF1	COX6B1	NDUFB5	NDUFA4	NDUFB1
HALLMARK_GLYCOLYSIS	http://www.gsea-msigdb.org/gsea/msigdb/cards/HALLMARK_GLYCOLYSIS	PGK1	ALDOA	ENO1	TPI1	PFKP	ERO1A	ALDOB	VEGFA	MXI1	PKM	HK2	LDHA	EXT1	SLC25A10	GUSB	PFKFB1	PGAM1	PYGB	AK4	P4HA1	PMM2	FAM162A	SDC1	EGLN3	PC	B4GALT7	FBP2	IGFBP3	CHPF	B3GAT3	CHST12	HS2ST1	MPI	GNPDA1	AKR1A1	PPFIA4	B3GAT1	CHPF2	G6PD	MDH2	CHST6	PGLS	PGAM2	CHST1	GPC1	GFUS	ALG1	GFPT1
HALLMARK_REACTIVE_OXYGEN_SPECIES_PATHWAY	http://www.gsea-msigdb.org/gsea/msigdb/cards/HALLMARK_REACTIVE_OXYGEN_SPECIES_PATHWAY	GSR	PRDX2	TXNRD1	SOD1	GCLC	CAT	GPX4	MPO	PRDX1	PRDX6	GCLM	TXN	SOD2	PRDX4	SELENOS	PDLIM1	TXNRD2	LAMTOR5	G6PD	MSRA	MBP	SRXN1	NQO1	OXSR1	GLRX2	HMOX2	FES	PFKP	NDUFB4	GPX3	SCAF4	CDKN2D	MGST1	ABCC1	FTL	ATOX1	STK25	EGLN2	ERCC2	SBNO2	JUNB	PTPA	LSP1	NDUFA6	HHEX	GLRX	NDUFS2	PRNP
HALLMARK_P53_PATHWAY	http://www.gsea-msigdb.org/gsea/msigdb/cards/HALLMARK_P53_PATHWAY	CDKN1A	BTG2	MDM2	CCNG1	FAS	TOB1	GADD45A	PHLDA3	TAP1	CDKN2B	SFN	ZMAT3	DDB2	EI24	PERP	DDIT4	ATF3	BAX	SESN1	FDXR	PIDD1	SAT1	CDKN2A	AEN	PPM1D	FOXO3	BTG1	TXNIP	SLC19A2	IER3	TP53	NOTCH1	RRAD	DCXR	NINJ1	FOS	S100A10	FBXW7	PLK3	XPC	AK1	TRIAP1	BAK1	CCND2	APAF1	PDGFA	NDRG1	RALGDS
HALLMARK_UV_RESPONSE_UP	http://www.gsea-msigdb.org/gsea/msigdb/cards/HALLMARK_UV_RESPONSE_UP	NXF1	SLC6A8	BAK1	CDC5L	HSPA2	POLR2H	ALAS1	TUBA4A	C4BPB	CCNE1	EPHX1	GRPEL1	ICAM1	FEN1	ARRB2	JUNB	CTSV	DGAT1	ATF3	CASP3	RASGRP1	TMBIM6	FOS	TAP1	E2F5	RAB27A	CCND3	SLC25A4	SPR	CDKN2B	SHOX2	OLFM1	IGFBP2	LYN	CLTB	BCL2L11	LHX2	NFKBIA	MSX1	H2AX	NR4A1	GLS	CDC34	MMP14	STK25	PDAP1	ABCB1	BSG
HALLMARK_UV_RESPONSE_DN	http://www.gsea-msigdb.org/gsea/msigdb/cards/HALLMARK_UV_RESPONSE_DN	TJP1	NFIB	TGFBR3	TFPI	MMP16	ABCC1	MAP2K5	AGGF1	PLCB4	MET	IRS1	PTPRM	AKT3	SIPA1L1	NR1D2	ATRN	ANXA2	ADD3	CDKN1B	ATXN1	CAP2	PRDM2	TOGARAM1	SDC2	SMAD3	SLC7A1	GCNT1	RUNX1	RND3	PLPP3	NR3C1	YTHDC1	PPARG	ADGRL2	DLG1	ATP2B4	NIPBL	PEX14	MYC	RASA2	FZD2	BMPR1A	LPAR1	PRKCA	MGMT	PRKCE	RXRA	LTBP1
HALLMARK_ANGIOGENESIS	http://www.gsea-msigdb.org/gsea/msigdb/cards/HALLMARK_ANGIOGENESIS	VCAN	POSTN	FSTL1	LRPAP1	STC1	LPL	VEGFA	PF4	THBD	FGFR1	TNFRSF21	CCND2	COL5A2	ITGAV	SERPINA5	KCNJ8	APP	JAG1	COL3A1	SPP1	NRP1	OLR1	PDGFA	PTK2	SLCO2A1	PGLYRP1	VAV2	S100A4	MSX1	VTN	TIMP1	APOH	PRG2	JAG2	LUM	CXCL6
HALLMARK_HEME_METABOLISM	http://www.gsea-msigdb.org/gsea/msigdb/cards/HALLMARK_HEME_METABOLISM	ALAS2	PPOX	FECH	HMBS	GYPB	ALAD	RHD	GYPA	SELENBP1	BLVRB	GYPE	GYPC	EPB42	SLC4A1	RHCE	RHAG	TAL1	MARCHF8	SPTB	UROD	HBQ1	DCAF11	ERMAP	EIF2AK1	CPOX	MPP1	GLRX5	TSPAN5	OSBP2	ANK1	NFE2	AHSP	SPTA1	MAP2K3	BNIP3L	SLC22A4	CLIC2	TRAK2	GCLC	KEL	RANBP10	TRIM10	TSPO2	UROS	XK	SNCA	MARK3	UBAC1
HALLMARK_COAGULATION	http://www.gsea-msigdb.org/gsea/msigdb/cards/HALLMARK_COAGULATION	F2	PROC	C1S	MMP14	F10	PLG	C1R	SERPINE1	SERPING1	C2	F12	CFI	MMP2	C3	F9	CTSO	TMPRSS6	MMP9	PROZ	MMP1	CFB	BMP1	VWF	FGA	F11	THBD	FURIN	MMP11	F8	LGMN	HPN	CTSB	MBL2	F13B	TIMP1	CTSV	MMP8	A2M	MMP10	MASP2	FGG	C8A	PLAU	ADAM9	GSN	CAPN2	PLAT	FN1
HALLMARK_IL2_STAT5_SIGNALING	http://www.gsea-msigdb.org/gsea/msigdb/cards/HALLMARK_IL2_STAT5_SIGNALING	SOCS2	CISH	PIM1	IL2RA	TNFRSF4	SOCS1	TNFRSF9	XBP1	RRAGD	HK2	PHLDA1	IL2RB	CTLA4	NFIL3	CD83	IKZF2	IL10	TNFRSF18	DHRS3	ECM1	ADAM19	SLC2A3	HIPK2	BATF3	BHLHE40	PTGER2	DENND5A	ITIH5	PHTF2	GADD45B	NRP1	NCOA3	CD79B	AHR	TNFRSF1B	NDRG1	BCL2L1	GABARAPL1	LIF	TIAM1	BMPR2	MAP3K8	RHOB	MYC	S100A1	ETFBKMT	CAPG	ST3GAL4
HALLMARK_BILE_ACID_METABOLISM	http://www.gsea-msigdb.org/gsea/msigdb/cards/HALLMARK_BILE_ACID_METABOLISM	SCP2	ABCD3	SLC27A2	HSD3B7	HSD17B4	AKR1D1	ABCD2	PEX1	CYP8B1	PNPLA8	PHYH	SLC27A5	CYP7B1	CYP27A1	PEX26	AGXT	PEX7	CROT	CYP39A1	ABCA3	CYP7A1	HACL1	PIPOX	PEX6	SOD1	GNPAT	HSD3B1	ABCA2	HAO1	PEX16	ABCD1	ACSL1	MLYCD	ABCG8	AQP9	ISOC1	NR1H4	PEX19	NPC1	HSD17B11	AMACR	CYP46A1	PEX13	IDH1	PEX11A	HSD17B6	EPHX2	PRDX5
HALLMARK_PEROXISOME	http://www.gsea-msigdb.org/gsea/msigdb/cards/HALLMARK_PEROXISOME	ABCD3	ACOT8	ACOX1	ACSL1	ECH1	ECI2	EHHADH	GSTK1	HSD17B4	MLYCD	PEX11A	RETSAT	SLC27A2	PEX13	PEX14	SCP2	HSD3B7	GNPAT	ABCD2	SLC25A17	PEX2	ACAA1	HAO2	HSD17B11	CRAT	PEX11B	LONP2	IDH1	FIS1	PEX6	ABCB4	SOD1	ABCB1	ISOC1	YWHAH	EPHX2	ABCD1	HMGCL	ACSL5	ALDH9A1	DHCR24	ELOVL5	NUDT19	PRDX5	CTPS1	IDE	SLC23A2	PEX5
HALLMARK_ALLOGRAFT_REJECTION	http://www.gsea-msigdb.org/gsea/msigdb/cards/HALLMARK_ALLOGRAFT_REJECTION	PTPRC	IL12B	TGFB1	IL12A	CD3E	CD3D	CD28	LYN	HCLS1	IL18	CRTAM	IFNG	CD3G	CD86	IL10	UBE2N	BCL10	CD4	LCK	NCK1	C2	HLA-A	ITGB2	HLA-DQA1	CD1D	CD80	HLA-DRA	THY1	TLR1	HLA-G	HLA-DMB	IL7	IL4	TNF	CD247	IL2	HLA-DMA	STAT1	IRF4	SRGN	INHBA	TLR3	ZAP70	CD74	CD40	TRAF2	B2M	BCL3
HALLMARK_SPERMATOGENESIS	http://www.gsea-msigdb.org/gsea/msigdb/cards/HALLMARK_SPERMATOGENESIS	PDHA2	TSSK2	TNP1	ZPBP	DPEP3	ADAM2	ACTL7B	GAPDHS	TUBA3C	LDHC	DDX25	PRM2	TCP11	PIAS2	PAPOLB	OAZ3	PHF7	ODF1	ACRBP	YBX2	CSNK2A2	NAA11	TULP2	ADAD1	SYCP1	DDX4	MLF1	TEKT2	SPATA6	PGK2	HSPA2	ACRV1	CLPB	CRISP2	ZC2HC1C	AKAP4	CCNA1	CCT6B	PACRG	GSG1	THEG	HSPA4L	CST8	DCC	HSPA1L	GSTM3	DNAJB8	IL13RA2
HALLMARK_KRAS_SIGNALING_UP	http://www.gsea-msigdb.org/gsea/msigdb/cards/HALLMARK_KRAS_SIGNALING_UP	ANGPTL4	ITGA2	SPRY2	HBEGF	RBP4	HSD11B1	ETV4	GLRX	DUSP6	SCG5	ETV5	ITGB2	AKT2	PPBP	G0S2	GABRA3	IRF8	BIRC3	FGF9	DCBLD2	INHBA	TFPI	TSPAN1	ADAM8	SLPI	PRKG2	MMP11	MMP10	TMEM158	TNFAIP3	PRDM1	GALNT3	ETS1	MMP9	WNT7A	IGFBP3	SPP1	ETV1	CLEC4A	CCND2	TSPAN7	ITGBL1	EMP1	CDADC1	KIF5C	TRIB2	SDCCAG8	PCP4
HALLMARK_KRAS_SIGNALING_DN	http://www.gsea-msigdb.org/gsea/msigdb/cards/HALLMARK_KRAS_SIGNALING_DN	CDH16	SPTBN2	FGFR3	NOS1	PDE6B	SIDT1	NTF3	SCN10A	TAS2R4	DTNB	HTR1D	MAST3	SLC6A3	CLDN8	TGM1	PCDHB1	THRB	YPEL1	RYR2	GDNF	CAMK1D	AMBN	LFNG	SERPINA10	ALOX12B	CALCB	FGGY	SPRR3	ATP6V1B1	EDN1	UPK3B	GAMT	PRODH	RYR1	GPR19	SLC29A3	EDN2	GPRC5C	C5	ZC2HC1C	EDAR	KCNMB1	TENT5C	STAG3	KRT4	SLC25A23	INSL5	GP1BA
HALLMARK_PANCREAS_BETA_CELLS	http://www.gsea-msigdb.org/gsea/msigdb/cards/HALLMARK_PANCREAS_BETA_CELLS	PAX6	NEUROD1	ISL1	NKX2-2	PCSK1	NKX6-1	SLC2A2	SEC11A	DCX	SPCS1	FOXA2	GCK	MAFB	INS	PDX1	ABCC8	IAPP	SRP9	NEUROG3	FOXO1	AKT3	GCG	DPP4	PAX4	SYT13	SCGN	HNF1A	STXBP1	CHGA	VDR	PCSK2	INSM1	SST	ELP4	SRPRB	PAK3	G6PC2	PKLR	LMO2	SRP14
[truncated: 152 more columns]

## Sheet: Table S4
Different expresion of cuproptosis-related genes
gene	conMean	tumorMean	logFC	pValue	fdr
FDX1	11.265	9.44423	-0.254348	5.83355e-07	1.26393e-06
LIPT1	2.15091	2.50868	0.22198	0.00277961	0.00451687
LIAS	2.61818	3.82293	0.546115	5.42596e-09	1.41075e-08
DLD	11.9912	14.0754	0.231203	0.0186504	0.0220414
GCSH	1.00574	2.23036	1.14903	2.18242e-25	2.83714e-24
DLAT	8.27939	12.0951	0.546829	5.66869e-15	3.68465e-14
PDHA1	9.866	13.0864	0.407528	1.1256e-10	3.65821e-10
PDHB	10.8977	12.1711	0.159441	0.00764444	0.0108222
SLC31A1	16.337	14.7969	-0.142846	0.00832473	0.0108222
MTF1	3.68633	3.3044	-0.157797	0.000717538	0.00133257
CDKN2A	0.498778	6.30616	3.66029	1.44844e-14	6.27655e-14

## Sheet: Table S5
The correlation between differentially expressed cuproptosis genes and FDA approved drugs
Gene	Drug	cor	pvalue
SLC31A1	Denileukin Diftitox Ontak	-0.468592	0.000159332
PDHA1	Dasatinib	-0.426769	0.000672869
PDHA1	Vismodegib	0.425605	0.000698581
LIAS	Palbociclib	0.415102	0.000974148
LIPT1	Everolimus	-0.405281	0.00131675
PDHA1	JNJ-42756493	-0.400046	0.00154052
DLD	Dasatinib	-0.399656	0.00155853
LIAS	Nelarabine	0.399096	0.00158463
PDHA1	Everolimus	-0.388512	0.002158
GCSH	Palbociclib	0.385764	0.00233434
PDHA1	Erlotinib	-0.383969	0.00245641
CDKN2A	Acetalax	0.375487	0.00311326
PDHB	JNJ-42756493	-0.372	0.00342575
PDHA1	Carmustine	0.369682	0.00364845
LIAS	LEE-011	0.368639	0.0037528
DLAT	Everolimus	-0.364374	0.00420757
DLAT	JNJ-42756493	-0.36223	0.00445405
CDKN2A	Valrubicin	-0.361809	0.0045039
CDKN2A	Mitoxantrone	-0.359077	0.00483971
LIAS	Vorinostat	0.3522	0.00578411
LIAS	Hydroxyurea	0.348356	0.00637974
CDKN2A	MITOXANTRONE	-0.343518	0.007205
FDX1	Ifosfamide	0.337998	0.00825957
PDHA1	Vorinostat	0.337673	0.00832555
DLAT	Belinostat	0.33614	0.00864336
FDX1	Everolimus	-0.334629	0.00896694
PDHA1	Ifosfamide	0.334441	0.00900809
LIAS	Asparaginase	0.331985	0.00955878
PDHB	Nelarabine	0.329886	0.0100523
DLAT	Vorinostat	0.327352	0.0106773
GCSH	LEE-011	0.325386	0.0111854
PDHA1	Lomustine	0.325305	0.0112067
LIAS	Crizotinib	0.325289	0.0112109
DLD	Raloxifene	0.321969	0.0121179
DLAT	METHOTREXATE	0.321929	0.0121293
LIAS	Dromostanolone Propionate	0.320908	0.0124209
LIAS	Cytarabine	0.317502	0.0134377
LIAS	Cyclophosphamide	0.317075	0.0135703
LIAS	LOXO-101	0.315474	0.0140768
LIAS	Acrichine	0.314723	0.0143198
DLD	tepotinib	0.313476	0.0147315
LIAS	Cladribine	0.311623	0.0153621
PDHA1	Cladribine	0.311401	0.015439
LIAS	Nitrogen mustard	0.311258	0.0154888
PDHA1	Hydroxyurea	0.305797	0.017497
GCSH	Dexrazoxane	0.305191	0.0177331
CDKN2A	Bisacodyl, active ingredient of Viraplex	0.302063	0.0189948
PDHA1	Cyclophosphamide	0.300252	0.0197596
DLD	Erlotinib	-0.299865	0.0199267
LIPT1	Ifosfamide	0.298794	0.0203946
PDHA1	Crizotinib	0.297345	0.0210423
PDHA1	Dromostanolone Propionate	0.296531	0.0214138
GCSH	Ifosfamide	0.294846	0.0222006
PDHB	Fludarabine	0.293272	0.0229571
FDX1	JNJ-42756493	-0.292524	0.0233243
SLC31A1	tepotinib	0.291038	0.0240691
DLD	Neratinib	-0.289831	0.0246881
LIAS	METHOTREXATE	0.288382	0.0254495
LIPT1	JNJ-42756493	-0.288344	0.0254698
DLAT	IPI-145	-0.287519	0.0259119
PDHA1	Dexrazoxane	0.286905	0.0262456
LIPT1	Nelarabine	0.286786	0.0263103
SLC31A1	Alectinib	-0.286628	0.0263973
DLAT	Zoledronate	-0.285223	0.0271774
GCSH	Everolimus	-0.281391	0.029405
LIAS	Clofarabine	0.280984	0.0296507
PDHA1	LEE-011	0.279941	0.0302871
LIAS	Idarubicin	0.276599	0.0324041
PDHA1	Neratinib	-0.275338	0.0332345
LIAS	Parthenolide	0.275308	0.0332545
DLAT	Ifosfamide	0.274477	0.0338116
FDX1	Nelarabine	0.27241	0.0352312
CDKN2A	Pemetrexed	-0.271438	0.0359157
DLD	Ixazomib citrate	0.268712	0.0378943
LIPT1	Olaparib	-0.268506	0.038047
PDHA1	Raloxifene	0.267528	0.0387809
DLD	Everolimus	-0.267479	0.0388184
FDX1	Vorinostat	0.266738	0.0393822
DLAT	Allopurinol	0.26553	0.0403166
DLAT	Copanlisib	-0.263366	0.0420364
DLAT	Nilotinib	0.263064	0.0422816
PDHA1	Nelarabine	0.260845	0.0441157
DLD	Bortezomib	0.259962	0.0448634
MTF1	Alectinib	-0.25977	0.0450276
PDHA1	tepotinib	0.25794	0.0466158
DLAT	Parthenolide	0.25643	0.0479601
PDHA1	Acrichine	0.255537	0.0487704
DLD	Crizotinib	0.255394	0.0489014
PDHB	Vinorelbine	-0.254709	0.0495317

## Sheet: Table S6
The raw qPCR data
	N1	N1	N1	N2	N2	N2	N3	N3	N3	N4	N4	N4	N5	N5	N5	N6	N6	N6	T1	T1	T1	T2	T2	T2	T3	T3	T3	T4	T4	T4	T5	T5	T5	T6	T6	T6
GAPDH	16.163	16.457	16.231	15.434	15.091	15.328	16.527	16.088	16.566	15.998	16.055	16.095	16.382	16.238	16.23	16.315	16.246	16.374	17.763	17.544	17.548	17.394	17.283	17.512	16.511	16.766	16.717	16.636	16.49	16.639	15.355	15.501	15.252	15.54	15.454	15.37
FDX1	22.277	22.098	22.313	20.418	20.75	20.319	22.627	22.211	22.61	21.637	21.569	21.217	20.902	20.396	20.791	21.878	21.517	21.493	24.532	24.418	24.283	24.316	24.49	24.141	23.321	23.63	23.298	25.276	25.284	25.375	24.691	24.814	24.792	24.531	24.686	24.551
LIPT1	22.306	22.117	22.212	21.503	21.405	21.401	22.576	22.328	22.546	22.382	22.663	22.372	23.909	23.571	23.61	22.77	22.699	22.419	22.138	22.627	22.467	21.702	21.916	22.131	22.315	22.261	22.676	21.583	21.18	21.172	22.045	21.585	21.667	21.829	21.304	21.633
LIAS	23.497	23.212	22.928	23.59	23.428	23.261	23.356	23.692	23.189	23.211	22.57	23.136	24.403	23.937	23.949	22.825	22.882	23.38	23.481	23.463	23.29	23.001	22.726	23.022	22.192	22.531	22.527	23.502	23.276	23.157	21.559	21.823	21.917	21.641	21.669	21.456
DLD	28.416	28.13	28.478	28.037	28.268	28.072	28.648	28.177	28.412	29.197	28.698	28.861	27.943	28.367	27.977	27.822	27.994	28.287	29.078	29.012	28.642	29.11	28.696	28.643	28.301	28.227	28.719	27.95	28.098	28.22	27.829	28.137	28.083	27.934	28.164	27.819
DBT	29.529	29.256	29.152	28.257	28.333	28.645	29.665	29.569	29.165	30.159	29.746	29.847	28.917	29.17	28.96	29.08	29.164	28.827	29.884	30.198	29.95	29.961	29.499	29.987	29.738	29.998	29.411	29.646	29.331	29.791	28.894	28.843	28.41	28.899	28.666	29.082
GCSH	29.567	29.777	29.791	28.542	28.573	28.272	29.947	29.528	29.881	29.322	29.591	29.456	29.398	29.446	29.705	29.626	29.31	29.337	29.183	28.8	29.051	28.633	29.095	28.721	28.753	28.405	28.391	28.824	28.589	28.355	27.178	27.446	27.025	27.541	27.152	26.854
DLST	23.906	23.941	23.38	23.221	22.808	23.428	23.483	23.498	24.192	23.009	23.927	23.332	23.516	23.422	23.611	23.524	23.326	23.487	24.921	24.819	24.693	23.642	23.991	23.816	23.521	23.435	23.293	23.524	23.689	23.853	23.426	22.817	22.803	22.968	23.28	23.297
DLAT	24.61	24.659	24.439	24.189	24.254	24.014	25.262	25.289	24.885	24.76	25.018	25.29	25.239	24.878	25.23	25.418	25.4	25.521	24.221	24.41	24.331	24.069	24.248	24.032	23.835	23.772	23.54	24.067	23.817	23.754	23.346	22.942	23.268	23.314	22.77	23.191
PDHA1	26.299	25.871	26.255	26.145	26.147	26.163	26.706	26.72	26.756	26.455	26.347	26.466	26.629	26.421	26.499	26.571	26.209	26.559	26.535	26.612	27.028	25.891	25.49	25.768	25.212	25.761	25.486	25.772	25.375	25.878	24.224	23.855	24.265	24.308	24.164	23.775
PDHB	26.967	26.792	26.678	26.76	26.786	26.471	25.919	26.186	26.275	26.138	25.929	26.003	26.46	26.746	26.808	25.66	26.265	26.118	26.648	26.243	26.385	26.072	26.119	26.344	25.163	25.457	25.089	25.642	25.759	25.307	24.212	24.405	24.419	24.06	24.286	24.357
SLC31A1	26.235	26.402	26.015	26.322	26.391	26.584	26.461	26.467	26.768	26.077	25.928	26.131	26.834	26.53	26.572	26.543	25.917	26.276	28.233	27.867	28.328	27.98	28.325	27.928	26.999	27.365	27.345	26.716	26.738	27.152	27.516	27.063	27.454	27	27.007	27.306
ATP7A	29.725	29.517	29.595	28.444	28.408	28.745	29.335	29.626	29.732	28.906	28.941	29.278	28.951	29.54	29.245	29.143	29.238	29.355	30.117	29.768	29.943	29.841	30.209	30.183	29.792	30.442	30.475	29.706	29.68	30.222	27.565	28.137	28.12	28.294	27.581	27.794
ATP7B	28.986	29.411	28.955	28.269	27.909	27.917	28.987	29.126	29.257	29.002	29.143	29.229	29.383	29.396	29.156	29.474	29.873	29.922	30.177	30.108	30.143	30.208	30.067	30.092	30.022	30.013	30.2	29.899	29.815	30.168	27.833	27.752	28.051	28.192	28.196	28.48
MTF1	24.831	24.672	24.632	23.248	23.404	23.943	24.071	24.063	24.354	24.477	24.908	24.491	24.794	24.58	24.761	24.273	24.713	24.681	26.244	26.195	25.989	26.533	26.715	26.922	25.07	25.176	24.987	25.874	26.17	25.862	25.667	25.771	25.54	25.015	24.983	25.285
GLS	23.133	23.446	23.116	22.188	22.213	22.002	23.357	23.375	23.617	22.988	23.225	23.221	23.265	23.276	23.592	23.796	24.137	23.769	24.732	25.103	24.695	23.96	23.917	24.292	23.822	24.028	23.485	23.849	24.283	24.074	22.981	23.464	23.031	23.221	22.902	23.311
CDKN2A	27.698	27.593	27.394	26.995	27.384	27.189	27.674	27.667	26.968	27.454	27.757	27.489	27.337	27.514	27.525	27.461	27.367	27.272	27.431	27.414	27.365	26.969	27.273	27.047	26.738	26.473	26.209	26.385	26.219	26.141	25.474	25.743	25.611	25.019	25.038	24.777

## Sheet: Table S7
The marker gene lists of 16 types of immune cells and 13 types of immune pathways for ssGSEA
aDCs	na	CD83	LAMP3	CCL1
APC_co_inhibition	na	C10orf54	CD274	LGALS9	PDCD1LG2	PVRL3
APC_co_stimulation	na	CD40	CD58	CD70	ICOSLG	SLAMF1	TNFSF14	TNFSF15	TNFSF18	TNFSF4	TNFSF8	TNFSF9
B_cells	na	BACH2	BANK1	BLK	BTLA	CD79A	CD79B	FCRL1	FCRL3	HVCN1	RALGPS2
CCR	na	CCL16	TPO	TGFBR2	CXCL2	CCL14	TGFBR3	IL11RA	CCL11	IL4I1	IL33	CXCL12	CXCL10	BMPER	BMP8A	CXCL11	IL21R	IL17B	TNFRSF9	ILF2	CX3CR1	CCR8	TNFSF12	CSF3	TNFSF4	BMP3	CX3CL1	BMP5	CXCR2	TNFRSF10D	BMP2	CXCL14	CCL28	CXCL3	BMP6	CCL21	CXCL9	CCL23	IL6	TNFRSF18	IL17RD	IL17D	IL27	CCL7	IL1R1	CXCR4	CXCR2P1	TGFB1I1	IFNGR1
CD8+_T_cells	na	CD8A
Check-point	na	IDO1	LAG3	CTLA4	TNFRSF9	ICOS	CD80	PDCD1LG2	TIGIT	CD70	TNFSF9	ICOSLG	KIR3DL1	CD86	PDCD1	LAIR1	TNFRSF8	TNFSF15	TNFRSF14	IDO2	CD276	CD40	TNFRSF4	TNFSF14	HHLA2	CD244	CD274	HAVCR2	CD27	BTLA	LGALS9	TMIGD2	CD28	CD48	TNFRSF25	CD40LG	ADORA2A	VTCN1	CD160	CD44	TNFSF18	TNFRSF18	BTNL2	C10orf54	CD200R1	TNFSF4	CD200	NRP1
Cytolytic_activity	na	PRF1	GZMA
DCs	na	CCL17	CCL22	CD209	CCL13
HLA	na	HLA-E	HLA-DPB2	HLA-C	HLA-J	HLA-DQB1	HLA-DQB2	HLA-DQA2	HLA-DQA1	HLA-A	HLA-DMA	HLA-DOB	HLA-DRB1	HLA-H	HLA-B	HLA-DRB5	HLA-DOA	HLA-DPB1	HLA-DRA	HLA-DRB6	HLA-L	HLA-F	HLA-G	HLA-DMB	HLA-DPA1
iDCs	na	CD1A	CD1E
Inflammation-promoting	na	CCL5	CD19	CD8B	CXCL10	CXCL13	CXCL9	GNLY	GZMB	IFNG	IL12A	IL12B	IRF1	PRF1	STAT1	TBX21
Macrophages	na	C11orf45	CD68	CLEC5A	CYBB	FUCA1	GPNMB	HS3ST2	LGMN	MMP9	TM4SF19
Mast_cells	na	CMA1	MS4A2	TPSAB1
MHC_class_I	na	B2M	HLA-A	TAP1
Neutrophils	na	EVI2B	HSD17B11	KDM6B	MEGF9	MNDA	NLRP12	PADI4	SELL	TRANK1	VNN3
NK_cells	na	KLRC1	KLRF1
Parainflammation	na	CXCL10	PLAT	CCND1	LGMN	PLAUR	AIM2	MMP7	ICAM1	MX2	CXCL9	ANXA1	TLR2	PLA2G2D	ITGA2	MX1	HMOX1	CD276	TIRAP	IL33	PTGES	TNFRSF12A	SCARB1	CD14	BLNK	IFIT3	RETNLB	IFIT2	ISG15	OAS2	REL	OAS3	CD44	PPARG	BST2	OAS1	NOX1	PLA2G2A	IFIT1	IFITM3	IL1RN
pDCs	na	CLEC4C	CXCR3	GZMB	IL3RA	IRF7	IRF8	LILRA4	PHEX	PLD4	PTCRA
T_cell_co-inhibition	na	BTLA	C10orf54	CD160	CD244	CD274	CTLA4	HAVCR2	LAG3	LAIR1	TIGIT
T_cell_co-stimulation	na	CD2	CD226	CD27	CD28	CD40LG	ICOS	SLAMF1	TNFRSF18	TNFRSF25	TNFRSF4	TNFRSF8	TNFRSF9	TNFSF14
T_helper_cells	na	CD4
Tfh	na	PDCD1	CXCL13	CXCR5
Th1_cells	na	IFNG	TBX21	CTLA4	STAT4	CD38	IL12RB2	LTA	CSF2
Th2_cells	na	PMCH	LAIR2	SMAD2	CXCR6	GATA3	IL26
TIL	na	ITM2C	CD38	THEMIS2	GLYR1	ICOS	F5	TIGIT	KLRD1	IRF4	PRKCQ	FCRL5	SIRPG	LPXN	IL2RG	CCL5	LCK	TRAF3IP3	CD86	MAL	LILRB1	DOK2	CD6	PAG1	LAX1	PLEK	PIK3CD	SLAMF1	XCL1	GPR171	XCL2	TBX21	CD2	CD53	KLHL6	SLAMF6	CD40	SIT1	TNFRSF4	CD79A	CD247	LCP2	CD3D	CD27	SH2D1A	FYB	ARHGAP30	ACAP1	CST7
Treg	na	IL12RB2	TMPRSS6	CTSC	LAPTM4B	TFRC	RNF145	NETO2	ADAT2	CHST2	CTLA4	NFE2L3	LIMA1	IL1R2	ICOS	HSDL2	HTATIP2	FKBP1A	TIGIT	CCR8	LTA	SLC35F2	IL21R	AHCYL1	SOCS2	ETV7	BCL2L1	RRAGB	ACSL4	CHRNA6	BATF	LAX1	ADPRH	TNFRSF4	ANKRD10	CD274	CASP1	LY75	NPTN	SSTR3	GRSF1	CSF2RB	TMEM184C	NDFIP2	ZBTB38	ERI1	TRAF3	NAB1	HS3ST3B1
Type_I_IFN_Reponse	na	DDX4	IFIT1	IFIT2	IFIT3	IRF7	ISG20	MX1	MX2	RSAD2	TNFSF10
Type_II_IFN_Reponse	na	GPR146	SELP	AHR
[truncated: 206 more columns]

## Sheet: Table S8
Univariable and multivariable Cox regression analysis for DEGs between the three cuproptosis molecular subtypes
Gene	Univariable analysis				Multivariable analysis
	HR	HR.95L	HR.95H	pvalue	HR	HR.95L	HR.95H	pvalue
FANCI	1.37525	1.25751	1.50402	3e-12	0.703905	0.562291	0.881186	0.00218673
IL27RA	0.849563	0.775004	0.931295	0.000503694	0.786159	0.673908	0.917106	0.00220753
DUSP4	1.06172	1.01139	1.11455	0.0156371	0.866057	0.785478	0.954902	0.00390031
IGFBP1	1.1514	1.09986	1.20537	1.61e-09	1.08306	1.01657	1.1539	0.0135686
SLC15A1	1.14589	1.08528	1.20988	9.04e-07	1.10911	1.02103	1.20479	0.0141683
C7	0.908253	0.869508	0.948723	1.52e-05	1.13292	1.02168	1.25628	0.0179465
C5	0.918984	0.871178	0.969414	0.00193771	1.0954	1.01261	1.18497	0.0230657
TMPRSS11E	1.1089	1.06881	1.15049	3.75e-08	1.06511	1.00726	1.1263	0.0268517
FOXM1	1.29537	1.21913	1.37636	6.12e-17	1.20733	1.01963	1.4296	0.0288603
HJURP	1.34763	1.26181	1.43929	6.3e-19	1.24563	1.02244	1.51755	0.0292394
SCTR	0.885219	0.843066	0.92948	9.7e-07	1.09871	1.00619	1.19974	0.0359491
FOLR1	0.893525	0.859987	0.928371	8.04e-09	1.08298	1.0051	1.16691	0.0363078
SPAG5	1.28136	1.18628	1.38405	2.93e-10	0.803835	0.651718	0.991457	0.0413385
GSTA1	0.898065	0.862737	0.93484	1.52e-07	0.941441	0.887615	0.998531	0.0445459
ECT2	1.39237	1.2877	1.50554	1.02e-16	1.18884	1.00252	1.40978	0.04671
CDCA3	1.28134	1.19867	1.36971	3.21e-13	0.825475	0.683146	0.997459	0.0469984
CXCL10	1.0648	1.01316	1.11908	0.0133036	0.854056	0.730569	0.998415	0.0477186
ISG15	1.12816	1.06192	1.19853	9.39e-05	1.08904	0.996469	1.19021	0.0598464
CRYM	0.838337	0.799902	0.878618	1.78e-13	0.935192	0.865145	1.01091	0.091641
CCNB2	1.42116	1.31808	1.5323	5.76e-20	1.23102	0.965541	1.5695	0.0935382
SLC2A1	1.39038	1.30593	1.48029	6.41e-25	1.10609	0.982706	1.24496	0.0947456
CXCL11	1.0905	1.03896	1.14459	0.000452649	1.1161	0.978902	1.27253	0.100729
GPR87	1.11929	1.0808	1.15915	2.75e-10	1.05457	0.989112	1.12436	0.104133
ZNF682	0.835122	0.779757	0.894419	2.63e-07	0.924961	0.841232	1.01702	0.107118
CRABP2	1.04564	1.00421	1.08879	0.0305082	1.04728	0.987867	1.11027	0.121067
MUC5B	1.04201	1.01028	1.07474	0.00910089	1.04323	0.988636	1.10085	0.122773
SPINK1	0.96699	0.941302	0.993379	0.0145423	0.966577	0.925363	1.00963	0.126257
LYPD3	1.17121	1.11637	1.22873	1.05e-10	0.946829	0.877656	1.02145	0.158085
CDC20	1.24173	1.17287	1.31464	1.03e-13	0.872498	0.720911	1.05596	0.16128
CSF2	0.914894	0.846157	0.989216	0.0256109	0.933936	0.847689	1.02896	0.166811
BIRC5	1.32087	1.23084	1.41747	1.1e-14	0.850399	0.673393	1.07393	0.173535
KCNK5	0.826491	0.774345	0.882149	9.98e-09	0.917436	0.808551	1.04098	0.181275
INHA	1.10238	1.05521	1.15165	1.25e-05	1.04422	0.979764	1.11292	0.183153
TRIM31	1.11591	1.05376	1.18173	0.000176101	1.06302	0.965796	1.17003	0.211731
TMEM100	0.884115	0.838023	0.932743	6.52e-06	0.947034	0.868851	1.03225	0.215753
CD55	0.873189	0.815136	0.935377	0.000111909	0.928985	0.82658	1.04408	0.216408
TNNT1	1.0991	1.0618	1.13771	8.16e-08	1.03259	0.981319	1.08653	0.217133
SFTPD	0.912753	0.884257	0.942169	1.69e-08	0.957209	0.89224	1.02691	0.222646
PLAU	1.13639	1.07437	1.20198	7.99e-06	0.932251	0.832825	1.04355	0.222776
PRC1	1.37483	1.27783	1.4792	1.5e-17	1.17676	0.902536	1.5343	0.229207
CD74	0.869685	0.799054	0.946559	0.00123435	1.15297	0.913879	1.45461	0.229963
HABP2	0.876454	0.837018	0.917748	1.98e-08	0.9546	0.883958	1.03089	0.236223
OGN	0.902266	0.8581	0.948706	5.91e-05	0.956573	0.888654	1.02968	0.237398
IFT57	0.844464	0.781354	0.912672	1.99e-05	0.923974	0.810317	1.05357	0.237724
S100B	0.929018	0.87565	0.985639	0.0147206	1.05808	0.962472	1.16318	0.242672
HMGA1	1.42183	1.30867	1.54479	9.01e-17	1.09123	0.941746	1.26443	0.245452
DOK4	0.800935	0.733376	0.874717	7.93e-07	0.914098	0.784591	1.06498	0.249208
CD83	0.811408	0.740372	0.88926	7.8e-06	1.10401	0.93201	1.30776	0.252159
ANXA10	1.04321	1.00679	1.08095	0.0196339	0.963272	0.902029	1.02867	0.264222
MUC5AC	1.06562	1.02425	1.10865	0.00165379	1.04401	0.966542	1.12768	0.273597
SLC7A11	1.09716	1.04461	1.15234	0.000213016	0.950517	0.867391	1.04161	0.277096
HLA-DPB1	0.837734	0.781113	0.89846	7.09e-07	0.900796	0.739772	1.09687	0.298448
CHIA	0.889731	0.84849	0.932976	1.4e-06	1.03751	0.967711	1.11235	0.300049
PIGR	0.877793	0.847762	0.908889	2.16e-13	0.965286	0.901186	1.03395	0.313559
WNT4	0.924532	0.865981	0.987042	0.0187379	1.04703	0.957314	1.14516	0.314628
AURKA	1.32132	1.22718	1.42267	1.48e-13	1.09811	0.912325	1.32172	0.322347
PRAME	1.06451	1.02626	1.10419	0.00081405	0.974681	0.925333	1.02666	0.333339
KLK11	0.928749	0.895855	0.962851	5.88e-05	0.975471	0.923777	1.03006	0.371343
DEFB1	1.08279	1.04087	1.12641	7.88e-05	1.02553	0.970127	1.0841	0.373626
LRRC36	0.836374	0.786773	0.889103	1.01e-08	0.957101	0.868603	1.05461	0.375747
TLR2	0.855071	0.794306	0.920485	3.14e-05	0.931572	0.79481	1.09187	0.381566
S100A2	1.12471	1.07965	1.17165	1.76e-08	1.0276	0.965298	1.09393	0.393521
CTSE	0.957814	0.925483	0.991273	0.0138832	1.02509	0.966092	1.08768	0.412627
MFAP4	0.860707	0.820712	0.902652	6.47e-10	0.959076	0.864261	1.06429	0.431425
CCL17	0.913387	0.858402	0.971893	0.00423719	0.966914	0.887315	1.05365	0.442719
SYT13	1.07709	1.02587	1.13087	0.00281204	1.0252	0.959646	1.09523	0.460381
CRISP3	1.05463	1.00664	1.10491	0.0251951	1.02142	0.965031	1.0811	0.464543
CA12	1.08667	1.03721	1.13848	0.000469767	1.02608	0.953732	1.10392	0.490085
MUC4	1.05245	1.00961	1.0971	0.0158968	1.01995	0.961922	1.08148	0.508602
CPB2	0.907748	0.87274	0.944161	1.41e-06	0.978693	0.91808	1.04331	0.509094
HLA-DMB	0.867045	0.803889	0.935163	0.000217992	0.921649	0.72307	1.17476	0.509887
HLA-DRA	0.882789	0.820002	0.950383	0.000926771	1.09284	0.837845	1.42545	0.512527
SCNN1B	0.843573	0.799975	0.889547	3.32e-10	1.02952	0.941904	1.12529	0.52147
CCNB1	1.34421	1.25262	1.4425	2.11e-16	1.07378	0.862844	1.33629	0.523511
CYP24A1	1.06348	1.02853	1.09961	0.000306395	0.983201	0.932395	1.03678	0.531425
PLLP	0.835193	0.779618	0.894731	2.96e-07	0.960871	0.846587	1.09058	0.536694
C4BPA	0.887235	0.857542	0.917956	5.61e-12	0.979396	0.916668	1.04642	0.537574
E2F8	1.25375	1.16865	1.34505	2.87e-10	0.958061	0.834105	1.10044	0.54447
CD69	0.883165	0.826521	0.943691	0.000239135	0.96367	0.85323	1.0884	0.551243
SERPINB3	1.04355	1.00528	1.08327	0.0253203	0.984631	0.933459	1.03861	0.569508
IRX5	0.895106	0.851975	0.940421	1.09e-05	1.02417	0.942781	1.11258	0.571887
DLC1	0.783568	0.723986	0.848054	1.5e-09	1.04472	0.894176	1.22062	0.581577
APOBEC3B	1.08444	1.02412	1.14832	0.00549855	0.977638	0.901327	1.06041	0.585467
BUB1B	1.36472	1.27083	1.46555	1.23e-17	1.06883	0.840445	1.35928	0.587321
HPGD	0.938403	0.90156	0.976751	0.00186419	1.01846	0.951549	1.09007	0.597817
CDC6	1.34385	1.25376	1.44041	6.97e-17	1.04966	0.876563	1.25695	0.598092
KIT	0.89346	0.845632	0.943992	5.99e-05	0.976376	0.892062	1.06866	0.603866
AGER	0.903479	0.861458	0.947551	2.95e-05	0.974579	0.883925	1.07453	0.605215
DMBT1	0.949361	0.916985	0.982881	0.00333204	1.01619	0.955982	1.0802	0.606237
CADM1	0.835485	0.779809	0.895136	3.25e-07	1.02768	0.925247	1.14146	0.61027
SLC47A1	0.832175	0.789118	0.87758	1.22e-11	0.981181	0.910792	1.05701	0.616932
HLA-DQB2	0.895067	0.854701	0.93734	2.5e-06	0.98107	0.909384	1.05841	0.621543
GLS	0.884485	0.813209	0.962007	0.00418938	1.0313	0.912196	1.16596	0.622542
HOXD1	0.884135	0.838712	0.932017	4.73e-06	1.02485	0.926679	1.13343	0.632786
CH25H	0.916927	0.867903	0.968721	0.00197811	1.02096	0.937254	1.11213	0.634641
HNF1B	0.835432	0.776434	0.898912	1.49e-06	1.03219	0.903348	1.17941	0.64139
GBP1	1.11974	1.04385	1.20114	0.00158587	1.04065	0.873387	1.23995	0.655815
SPINK2	0.92046	0.863982	0.98063	0.0103055	1.01881	0.937778	1.10684	0.659467
USH1C	1.10095	1.03033	1.17641	0.00446323	0.971249	0.850507	1.10913	0.666683
SCN7A	0.837554	0.786888	0.891482	2.58e-08	0.976934	0.874163	1.09179	0.680706
KCNJ15	0.856374	0.810801	0.904508	2.74e-08	1.01863	0.928807	1.11715	0.695073
ATP8A1	0.782515	0.723276	0.846606	1.02e-09	0.974398	0.851129	1.11552	0.707052
ATP2C2	0.901601	0.834921	0.973606	0.00823505	0.978964	0.873175	1.09757	0.715578
S100P	1.06436	1.03466	1.09492	1.56e-05	1.00893	0.959547	1.06086	0.728377
SLC44A4	0.916502	0.866633	0.96924	0.00225481	0.984119	0.895515	1.08149	0.739463
ESPL1	1.30453	1.20671	1.41026	2.31e-11	1.03354	0.83798	1.27475	0.757861
EPS8L3	1.06705	1.01706	1.11949	0.008021	0.985297	0.895593	1.08399	0.761021
KIFC1	1.25768	1.18063	1.33977	1.18e-12	0.976865	0.833752	1.14454	0.772116
TFF1	1.05203	1.02478	1.08001	0.000152045	1.0082	0.953923	1.06556	0.772505
ADH1B	0.881696	0.847009	0.917803	7.82e-10	1.01806	0.895772	1.15705	0.783957
CLIC2	0.850264	0.796907	0.907193	9.32e-07	1.01542	0.909782	1.13331	0.784888
TPX2	1.2934	1.21907	1.37227	1.61e-17	0.96975	0.770952	1.21981	0.792992
BACE2	1.07225	1.00111	1.14844	0.0464163	1.01368	0.912653	1.12589	0.799761
NEIL3	1.21386	1.14196	1.2903	4.95e-10	1.01648	0.89552	1.15379	0.800332
PLA2G1B	0.891151	0.855073	0.928751	4.62e-08	1.01026	0.932993	1.09393	0.801458
TRIP13	1.26872	1.19089	1.35164	1.73e-13	0.982839	0.85728	1.12679	0.803962
PGC	0.933014	0.908123	0.958587	5.02e-07	0.993525	0.943773	1.0459	0.804279
INSL4	1.08299	1.03947	1.12833	0.000139187	0.991794	0.927577	1.06046	0.809341
SORBS2	0.855812	0.80178	0.913486	2.88e-06	1.01322	0.907743	1.13096	0.814815
CDC45	1.21851	1.15409	1.28652	9.96e-13	1.01307	0.901979	1.13784	0.826573
AQP3	0.866571	0.823764	0.911603	3.02e-08	1.01031	0.921173	1.10808	0.827644
FA2H	1.07227	1.0024	1.14702	0.0423891	1.01269	0.900337	1.13907	0.833521
TFCP2L1	0.850453	0.795053	0.909713	2.44e-06	0.98912	0.889312	1.10013	0.840244
MYBL2	1.2165	1.15261	1.28393	1.08e-12	0.987744	0.870511	1.12076	0.848286
HLA-DPA1	0.889883	0.829802	0.954314	0.00107121	1.01769	0.84836	1.22082	0.850212
OIP5	1.33344	1.24229	1.43127	1.65e-15	1.01691	0.848421	1.21887	0.855994
IL37	0.960372	0.925823	0.99621	0.0305354	0.995657	0.943751	1.05042	0.873414
AURKB	1.26986	1.1824	1.3638	5.33e-11	1.0132	0.859283	1.1947	0.876002
HLA-DMA	0.814186	0.754074	0.879091	1.5e-07	1.02065	0.786857	1.32391	0.877604
MNDA	0.927705	0.869369	0.989957	0.023539	1.00976	0.870291	1.17159	0.898065
GGH	1.23981	1.16302	1.32166	4.41e-11	0.993316	0.889672	1.10903	0.905054
ICAM4	0.880881	0.814461	0.952718	0.00151958	0.992981	0.881245	1.11889	0.907935
SLC22A3	0.888098	0.845069	0.933318	2.82e-06	0.994986	0.911446	1.08618	0.910549
FMO5	0.863534	0.820664	0.908644	1.63e-08	1.00463	0.915716	1.10218	0.922118
CDH3	1.12755	1.07401	1.18376	1.32e-06	0.996412	0.917782	1.08178	0.931711
SCGB1A1	0.956108	0.934538	0.978176	0.000115585	1.00121	0.966421	1.03726	0.946373
CST6	1.07424	1.02465	1.12622	0.00297732	1.00243	0.923614	1.08796	0.953758
ABCA3	0.870518	0.826715	0.916642	1.41e-07	1.00252	0.902468	1.11367	0.962523
TROAP	1.28419	1.18911	1.38686	1.85e-10	0.996295	0.834565	1.18937	0.967237
CA10	0.911285	0.862724	0.96258	0.000884251	1.00091	0.932175	1.0747	0.980096
EPHX1	0.868817	0.817234	0.923655	6.7e-06	0.998731	0.897197	1.11175	0.981473
AKR1B10	1.05249	1.02647	1.07917	6.2e-05	0.999448	0.952202	1.04904	0.982186
ICAM1	0.896702	0.836861	0.960821	0.00197361	0.998406	0.864014	1.1537	0.982742
SFTPC	0.950523	0.92871	0.972848	1.84e-05	1.00055	0.950464	1.05327	0.983309
CYP4B1	0.886617	0.85885	0.915281	1.24e-13	1.00053	0.933445	1.07244	0.987974
CDKN2A	1.07166	1.01557	1.13086	0.0116356	0.999761	0.937383	1.06629	0.994204
PMAIP1	1.18144	1.11112	1.25621	1.01e-07	1.00022	0.906343	1.10382	0.996516

## Sheet: Table S9
The genes and their risk coefficient in the CGR_score formula
Gene	Coef
FANCI	-0.147816
IL27RA	-0.202403
DUSP4	-0.0418421
IGFBP1	0.0951217
SLC15A1	0.0805758
C7	0.0553238
C5	-0.0178495
TMPRSS11E	0.0855037
FOXM1	0.209188
HJURP	0.267051
SCTR	0.00618853
FOLR1	0.0261747
SPAG5	-0.21665
GSTA1	-0.0907141
ECT2	0.192941
CDCA3	-0.085257
CXCL10	-0.00854894
